# Supplementary material for: Coordination polymers containing ferrocene backbone. Synthesis, structure and electrochemistry
Source: Royal Society of Chemistry journal article supplement (doi:10.1039/b922044e), 2010-01-01
Supplement: b922044e.pdf [file b922044e.pdf]

# Coordination Polymers Containing Ferrocene Backbone. Synthesis, Structure and Electrochemistry

*Vadapalli Chandrasekhar\*, and Ramalingam Thirumoorthi*

Department of Chemistry, Indian Institute of Technology Kanpur, Kanpur–208016, India

e-mail: [vc@iitk.ac.in](mailto:vc@iitk.ac.in)

Tel: 91-512-2597259, Fax: 91-512-2590007/2597436.

[\*] Prof. V. Chandrasekhar  
Department of Chemistry  
Indian Institute of Technology, Kanpur  
Kanpur – 208016, India  
Fax: (+91)-512-2597436  
E-mail: [vc@iitk.ac.in](mailto:vc@iitk.ac.in)

### Alternate procedure for the synthesis of **3-6**:

A mixture of **2** (0.050 g, 0.050 mmol), 4-methylpyridine (0.005 g) /4,4'-bipyridine (0.008 g) or 4,4'-trimethylenebipyridine (0.010 g) or 4,4'-vinylenebipyridine (0.009 g) were heated in toluene (20 mL) under reflux for 2h. The reaction mixture was cooled and the solvent removed in vacuo to afford a yellow solid. This was washed with hexane (10 mL), Et<sub>2</sub>O (2 mL) dried and recrystallised to give pure samples of **3-6**.

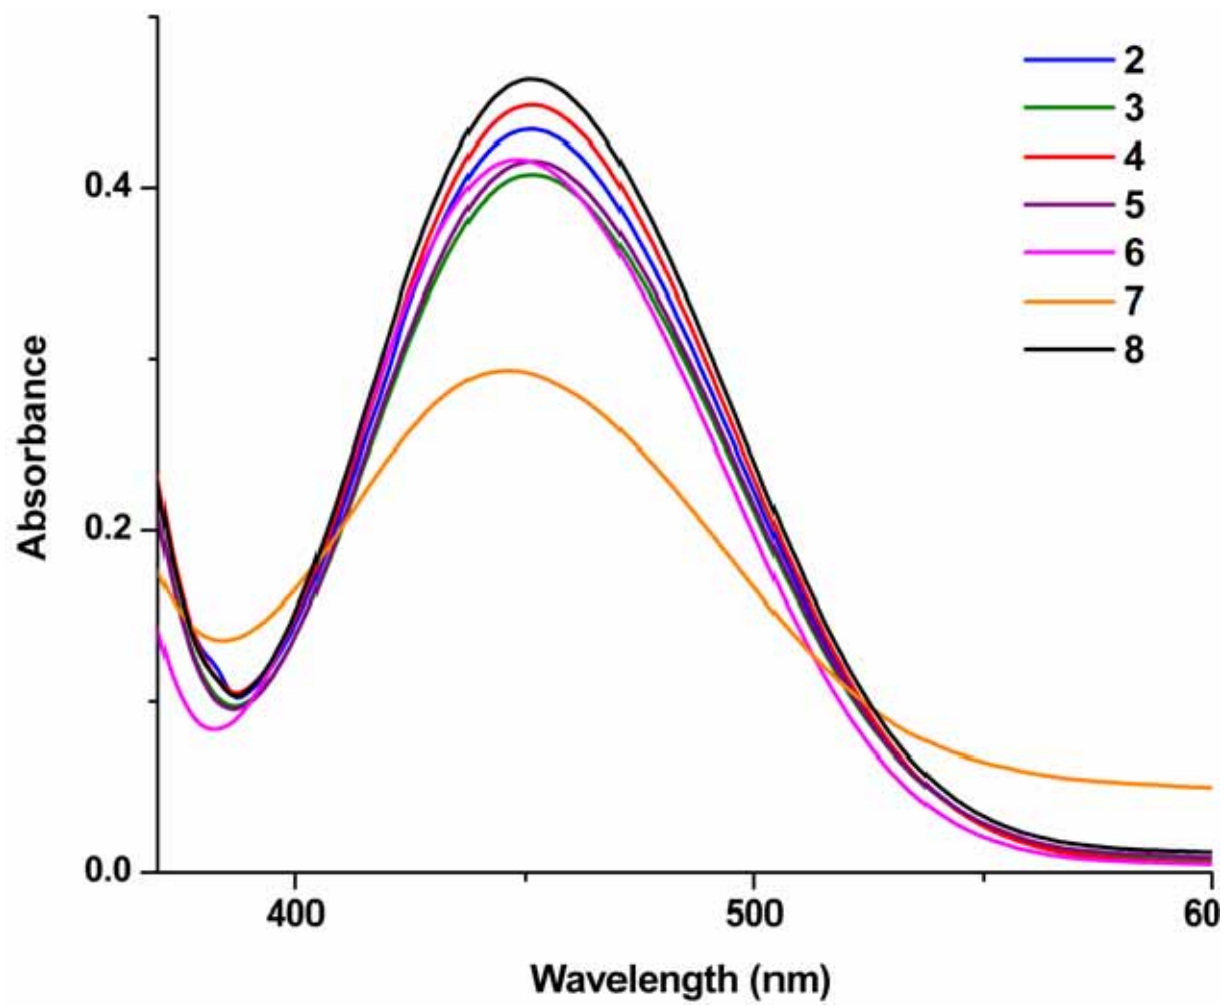

**Figure S1.** UV-visible spectra of **2-8**.

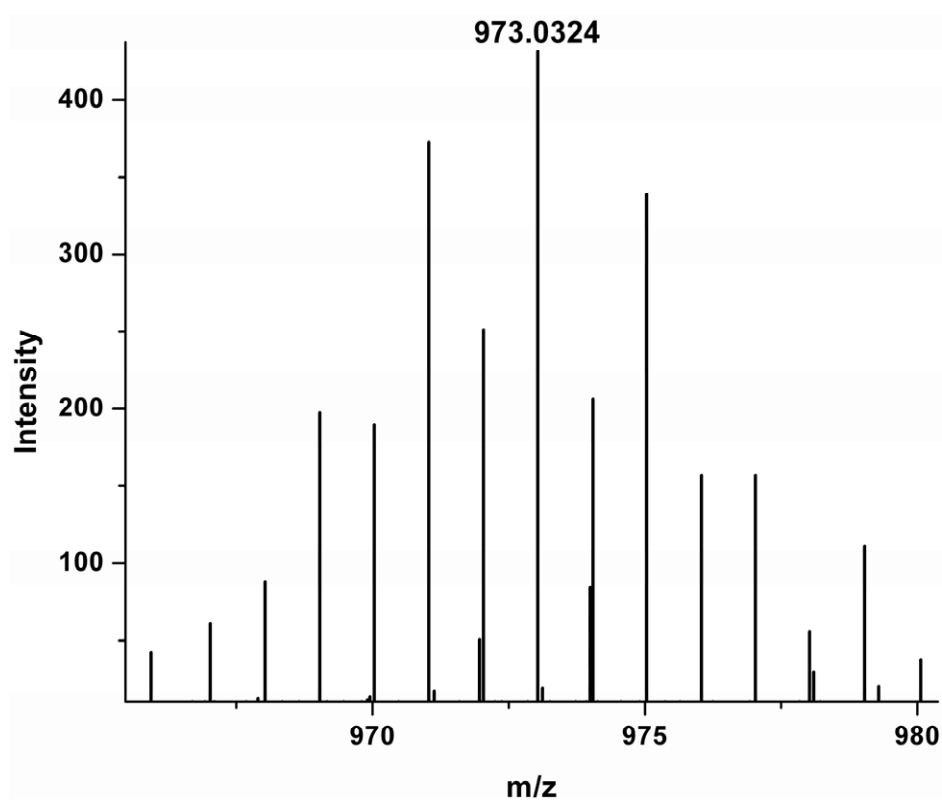

Figure S2. ESI-MS of 2.

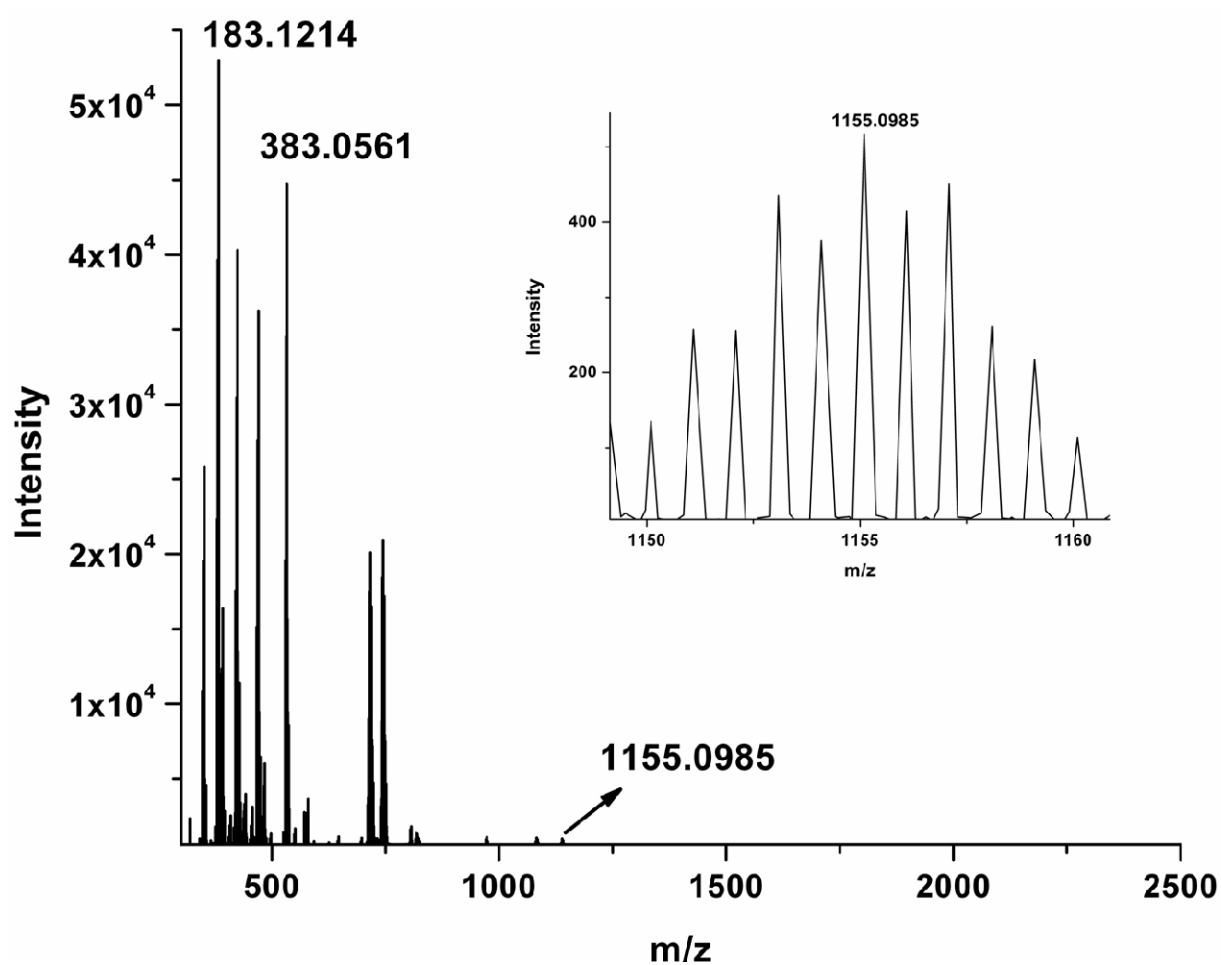

Figure S3. ESI-MS of 6. Inset picture shows the isotopic pattern of  $[(\text{Ph}_3\text{Sn})_2\text{LH}(\text{bpe})]^+$ .

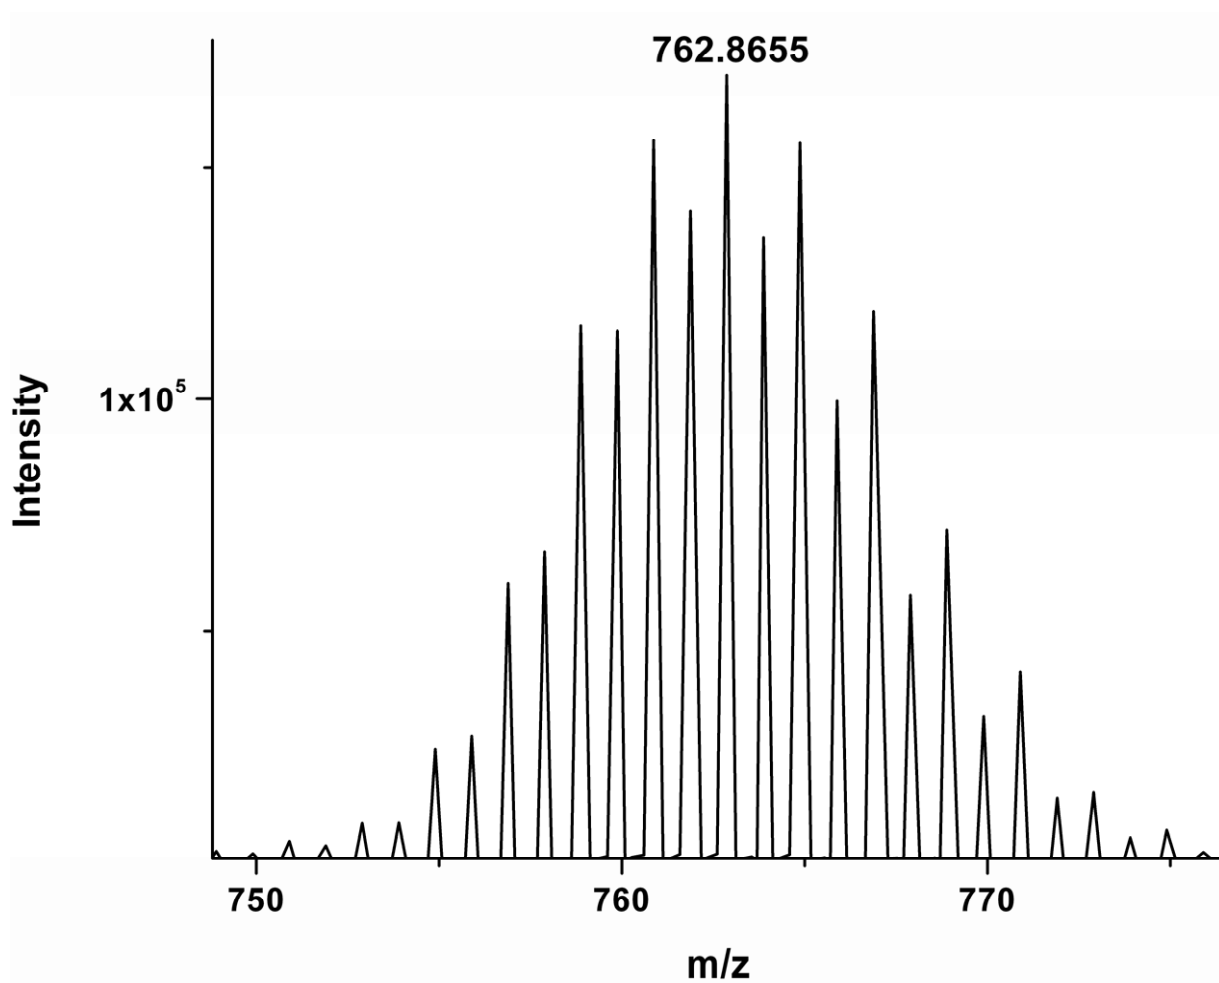

**Figure S4.** ESI-MS of 7.

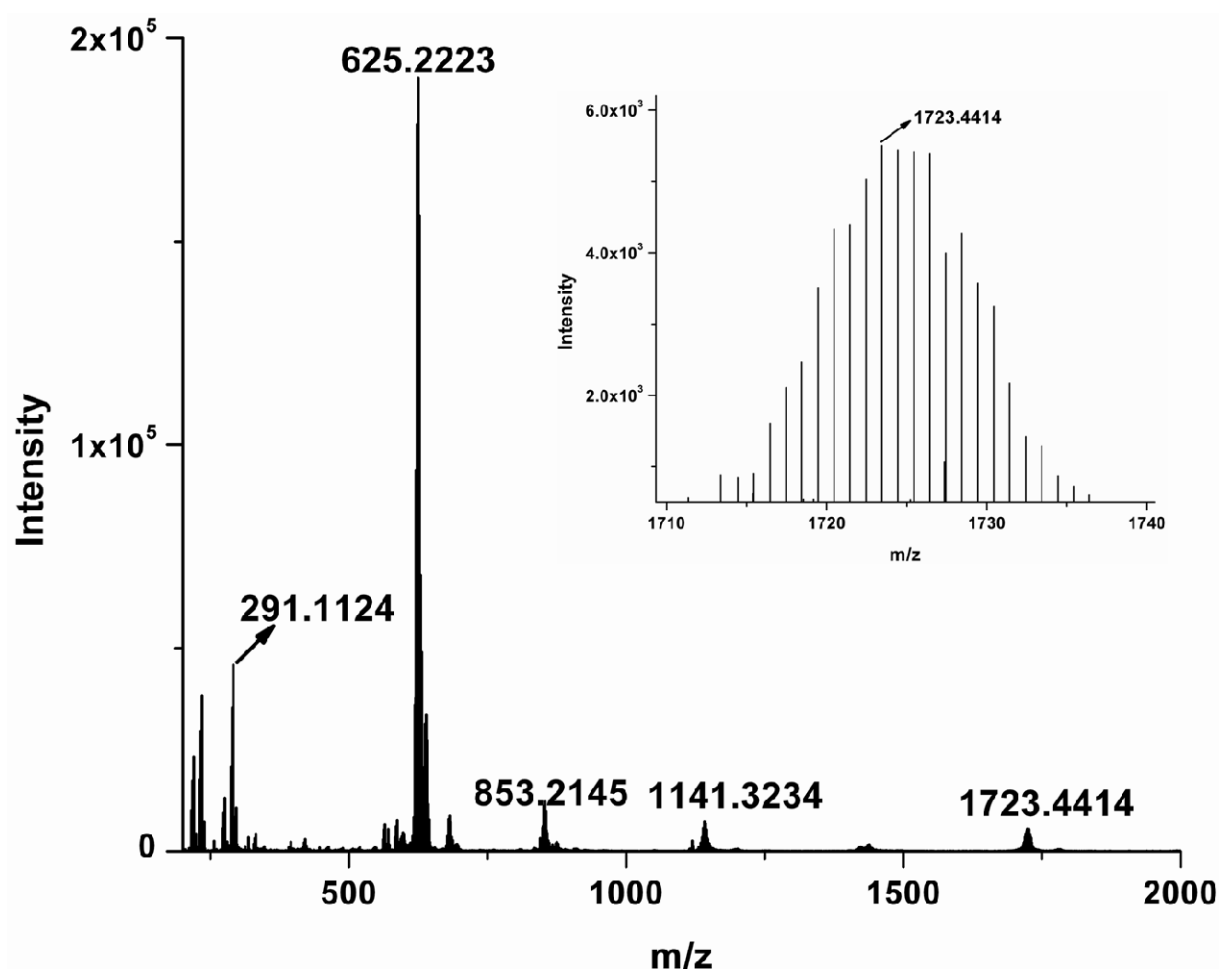

**Figure S5.** ESI-MS of **8**. Inset picture shows the isotopic pattern of  $[(n\text{-Bu}_3\text{Sn})_4(\text{L})(\text{LH})]^+$ .

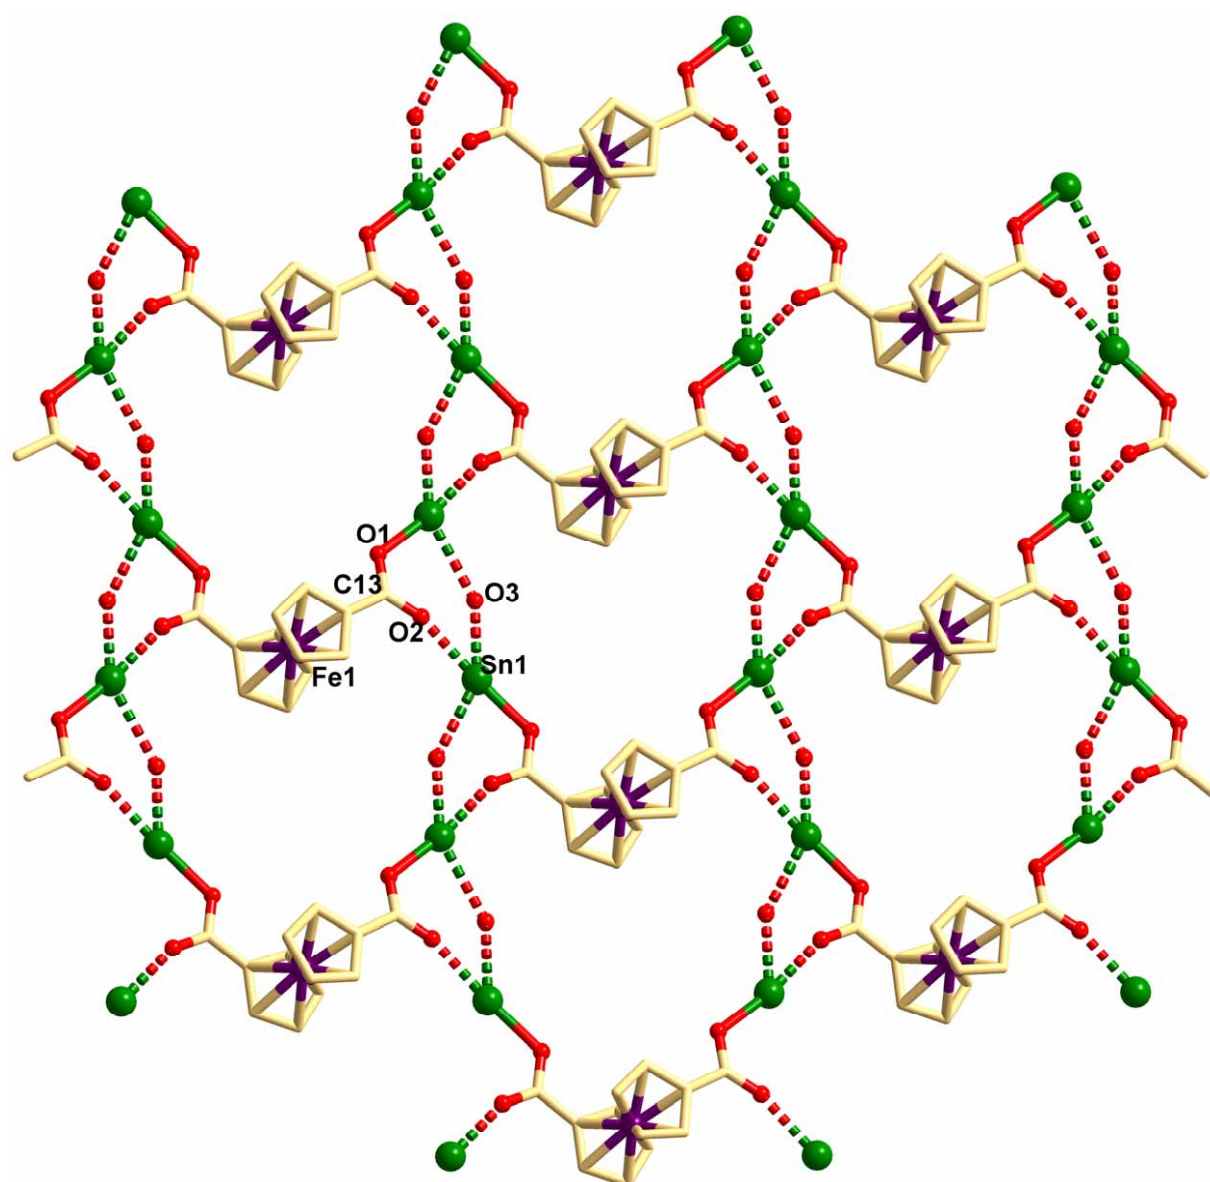



**Figure S6.** 2D polymeric structure of **8**. Hydrogen atoms have been omitted.

## Supramolecular structures of **2** and **5**

Compound **2** shows an interesting supramolecular assembly in the solid-state due to two different types of  $\pi$ -stacking interactions. A C-H... $\pi$  interaction between the ferrocenyl C-H and the aromatic phenyl substituent on the tin (H22... $\pi$  2.5025(2) Å) leads to the formation of a 1D polymer. Further, two such 1D polymers are interconnected by C-H of the edge of aryl with face of other aryl groups leading to a 2D polymer (H42... $\pi$  3.4894 (42); H41... $\pi$  3.0791 (41); H38... $\pi$  2.8697 (41); H39... $\pi$  3.2544 (41) Å) (Figure S7). In compound **5** we have observed interaction between two 1D polymers through dichloromethane due to two different C-H...Cl interactions (H10...Cl2 2.8622(26) and H37...Cl1 2.8528(20) Å) between the chlorine atoms of dichloromethane and the C-H of the aryl group and a ferrocenyl group (Figure S8).

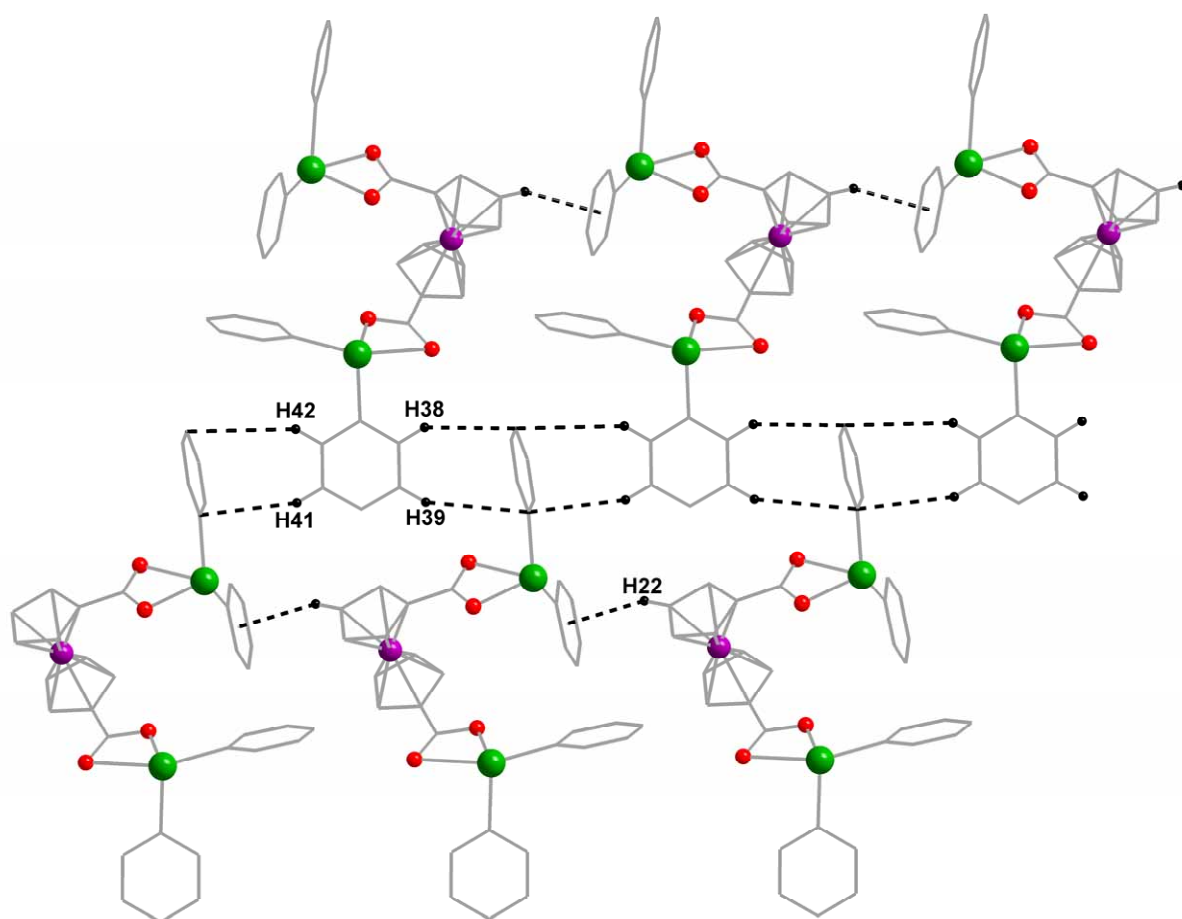

**Figure S7.** 2D polymeric structure of **2**. 2D polymers arises due to two different C-H... $\pi$  interaction between molecules.

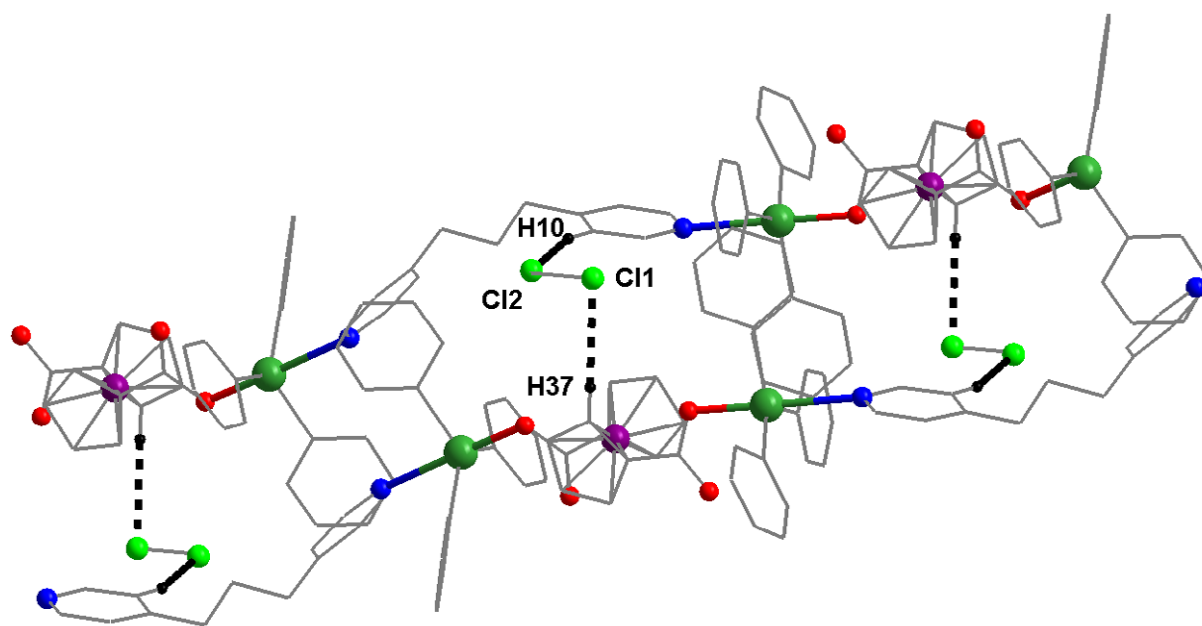

**Figures S8.** C-H...Cl interactions between two different 1D polymers of **5**. Except H10 and H37 remaining all the hydrogen atoms are removed for the clarity.

**Table S1.** Selected bond lengths (Å) and angles (°) for compounds **2-5**

| <b>2</b>          |            |                   |            |
|-------------------|------------|-------------------|------------|
| Sn(1)-O(1)        | 2.093(3)   | C(19)-O(1)        | 1.324(5)   |
| Sn(2)-O(2)        | 2.061(3)   | C(30)-O(2)        | 1.314(5)   |
| Sn(1)-O(4)        | 2.552(3)   | C(30)-O(3)        | 1.225(5)   |
| Sn(2)-O(3)        | 2.794(3)   | C(19)-O(4)        | 1.233(5)   |
| O(1)-Sn(1)-O(4)   | 55.93(10)  | O(1)-Sn(1)-C(7)   | 99.66(14)  |
| O(1)-Sn(1)-C(13)  | 104.50(13) | C(13)-Sn(1)-C(7)  | 111.20(16) |
| O(1)-Sn(1)-C(1)   | 108.83(13) | C(1)-Sn(1)-C(7)   | 104.04(16) |
| C(13)-Sn(1)-C(1)  | 125.68(16) | C(13)-Sn(1)-O(4)  | 81.55(13)  |
| C(1)-Sn(1)-O(4)   | 83.10(13)  | O(2)-Sn(2)-C(31)  | 105.02(14) |
| C(7)-Sn(1)-O(4)   | 155.31(14) | O(2)-Sn(2)-C(43)  | 97.84 (14) |
| C(31)-Sn(2)-C(43) | 113.83(17) | C(31)-Sn(2)-C(37) | 116.97(17) |
| O(2)-Sn(2)-C(37)  | 113.53(14) | C(43)-Sn(2)-C(37) | 108.08(16) |
| <b>3</b>          |            |                   |            |
| Sn(1)-O(2)        | 2.146(4)   | O(1)-C(25)        | 1.210(7)   |
| Sn(1)-N(1)        | 2.485(4)   | O(2)-C(25)        | 1.301(6)   |
| C(19)-Sn(1)-C(7)  | 126.4(2)   | O(2)-Sn(1)-C(13)  | 89.54(17)  |
| C(19)-Sn(1)-O(2)  | 96.28(17)  | C(19)-Sn(1)-N(1)  | 84.40(17)  |
| C(7)-Sn(1)-O(2)   | 97.86(16)  | C(7)-Sn(1)-N(1)   | 83.97(16)  |
| C(19)-Sn(1)-C(13) | 118.04(19) | O(2)-Sn(1)-N(1)   | 177.07(14) |
| C(7)-Sn(1)-C(13)  | 113.52(19) | C(13)-Sn(1)-N(1)  | 87.64(17)  |
| <b>4</b>          |            |                   |            |
| Sn(1)-O(1)        | 2.121(3)   | Sn(2)-N(2)        | 2.628(4)   |
| Sn(2)-O(3)        | 2.121(3)   | C(1)-O(1)         | 1.314(6)   |
| Sn(1)-N(1)        | 2.621(4)   | C(1)-O(2)         | 1.220(6)   |
| O(1)-Sn(1)-C(8)   | 98.82(16)  | C(42)-Sn(2)-O(3)  | 102.01(15) |
| O(1)-Sn(1)-C(14)  | 94.44(15)  | C(42)-Sn(2)-C(30) | 130.11(18) |
| C(8)-Sn(1)-C(14)  | 130.65(19) | O(3)-Sn(2)-C(30)  | 92.86(15)  |
| O(1)-Sn(1)-C(2)   | 90.93(16)  | C(42)-Sn(2)-C(36) | 113.34(18) |
| C(8)-Sn(1)-C(2)   | 112.99(18) | O(3)-Sn(2)-C(36)  | 90.87(16)  |
| C(14)-Sn(1)-C(2)  | 114.08(18) | C(30)-Sn(2)-C(36) | 113.74(19) |
| <b>5</b>          |            |                   |            |
| Sn(1)-O(1)        | 2.135(4)   | C(32)-O(1)        | 1.295(7)   |
| Sn(2)-O(3)        | 2.107(4)   | C(32)-O(2)        | 1.237(7)   |

|                   |           |                   |            |
|-------------------|-----------|-------------------|------------|
| Sn(1)-N(2)        | 2.598(4)  | C(43)-O(3)        | 1.313(7)   |
| Sn(2)-N(1)        | 2.667(5)  | C(43)-O(4)        | 1.216(7)   |
| C(20)-Sn(1)-C(26) | 129.5(2)  | O(1)-Sn(1)-N(2)   | 179.26(14) |
| C(20)-Sn(1)-O(1)  | 95.17(18) | C(14)-Sn(1)-N(2)  | 89.95(18)  |
| C(26)-Sn(1)-O(1)  | 97.37(17) | C(50)-Sn(2)-O(3)  | 97.19(17)  |
| C(20)-Sn(1)-C(14) | 115.4(2)  | C(50)-Sn(2)-C(56) | 126.9(2)   |
| C(26)-Sn(1)-C(14) | 113.5(2)  | O(3)-Sn(2)-C(56)  | 96.47(19)  |
| O(1)-Sn(1)-C(14)  | 89.56(18) | C(50)-Sn(2)-C(44) | 116.5(2)   |
| C(20)-Sn(1)-N(2)  | 84.54(18) | O(3)-Sn(2)-C(44)  | 89.89(19)  |
| C(26)-Sn(1)-N(2)  | 83.33(17) | C(56)-Sn(2)-C(44) | 114.6(2)   |

**Table S2.** Selected bond lengths (Å) and angles (°) for compounds **6-8**

| <b>6</b>          |            |                  |            |
|-------------------|------------|------------------|------------|
| Sn(1)-O(1)        | 2.127(3)   | O(1)-C(6)        | 1.316(6)   |
| Sn(1)-N(1)        | 2.579(4)   | O(2)-C(6)        | 1.214(6)   |
| C(13)-Sn(1)-O(1)  | 99.31(17)  | C(7)-Sn(1)-C(19) | 117.12(19) |
| C(13)-Sn(1)-C(7)  | 124.4(2)   | C(13)-Sn(1)-N(1) | 83.35(16)  |
| O(1)-Sn(1)-C(7)   | 95.09(17)  | O(1)-Sn(1)-N(1)  | 177.29(14) |
| C(13)-Sn(1)-C(19) | 116.5(2)   | C(7)-Sn(1)-N(1)  | 82.94(17)  |
| O(1)-Sn(1)-C(19)  | 89.23(17)  | C(19)-Sn(1)-N(1) | 90.02(17)  |
| C(7)-Sn(1)-C(19)  | 117.12(19) |                  |            |
| <b>7</b>          |            |                  |            |
| Sn(1)-O(1)        | 2.138(3)   | C(4)-O(1)        | 1.278(5)   |
| Sn(2)-O(2)        | 2.494(3)   | C(4)-O(2)        | 1.229(5)   |
| C(2)-Sn(1)-C(3)   | 123.4(2)   | O(1)-Sn(1)-O(2)  | 173.55(12) |
| C(2)-Sn(1)-C(1)   | 119.7(3)   | C(1)-Sn(1)-O(1)  | 89.08(18)  |
| C(3)-Sn(1)-C(1)   | 115.4(3)   | C(2)-Sn(1)-O(2)  | 83.37(16)  |
| C(2)-Sn(1)-O(1)   | 95.81(17)  | C(3)-Sn(1)-O(2)  | 88.47(17)  |
| C(3)-Sn(1)-O(1)   | 97.28(18)  |                  |            |
| <b>8</b>          |            |                  |            |
| Sn(1)-O(1)        | 2.156(3)   | C(13)-O(1)       | 1.275(6)   |
| Sn(1)-O(2)        | 2.444(4)   | C(13)-O(2)       | 1.251(6)   |
| Sn(1)-O(3)        | 2.507(8)   |                  |            |
| C(5)-Sn(1)-C(1)   | 122.0(2)   | C(5)-Sn(1)-O(2)  | 83.51(17)  |
| C(5)-Sn(1)-C(9)   | 111.3(2)   | C(1)-Sn(1)-O(2)  | 81.73(19)  |
| C(1)-Sn(1)-C(9)   | 124.1(2)   | C(9)-Sn(1)-O(2)  | 88.75(18)  |
| C(5)-Sn(1)-O(1)   | 89.90(17)  | O(1)-Sn(1)-O(2)  | 171.66(13) |
| C(1)-Sn(1)-O(1)   | 97.58(19)  | C(5)-Sn(1)-O(3)  | 42.1(2)    |
| C(9)-Sn(1)-O(1)   | 98.43(18)  | C(1)-Sn(1)-O(3)  | 101.1(2)   |
| C(9)-Sn(1)-O(3)   | 107.3(2)   | O(2)-Sn(1)-O(3)  | 41.74(19)  |
| O(1)-Sn(1)-O(3)   | 131.0(2)   |                  |            |
